# Supplementary material for: An eco-friendly method of extracting alizarin from Rubia tinctorum roots under supercritical carbon dioxide and its application to wool dyeing
Source: PubMed Central journal article supplement (PMC9807584; doi:10.1038/s41598-022-27110-0), 2023-01-02
Supplement: 41598_2022_27110_MOESM1_ESM.pdf [file 41598_2022_27110_MOESM1_ESM.pdf]

## Standard curve of alizarin

| Alizarin | RT   | Area ( $\mu\text{V}\cdot\text{sec}$ ) | conc. ( $\mu\text{g}/\text{ml}$ ) |
|----------|------|---------------------------------------|-----------------------------------|
|          | 2.11 | 220242                                | 25                                |
|          | 2.21 | 528150                                | 50                                |
|          | 2.08 | 1060998                               | 100                               |
|          | 2.06 | 1676062                               | 150                               |
|          | 2.1  | 2170979                               | 200                               |

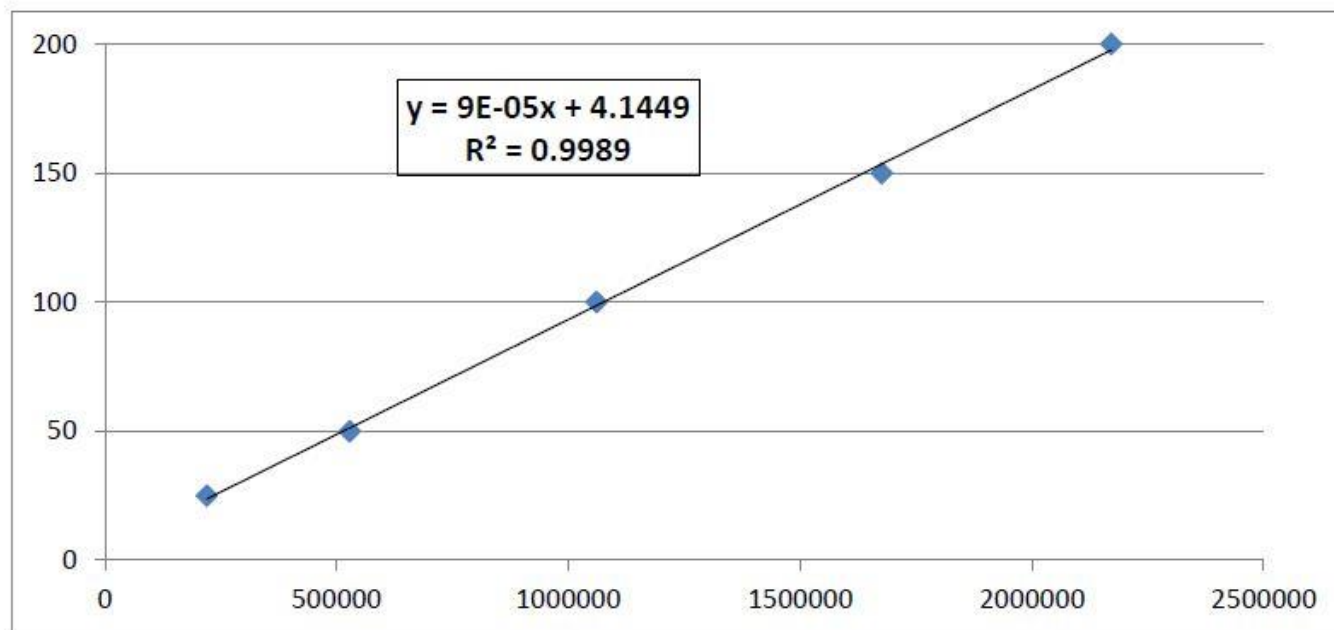

## Color measurement

| No. | Mordant                                         | RE | L*(D65) | a*(D65) | b*(D65) | K/S<br>Val(360) | K/S<br>Val(370) | K/S<br>Val(380) | K/S<br>Val(390) | K/S<br>Val(400) | K/S<br>Val(410) | K/S<br>Val(420) | K/S<br>Val(430) | K/S<br>Val(440) | K/S<br>Val(450) |
|-----|-------------------------------------------------|----|---------|---------|---------|-----------------|-----------------|-----------------|-----------------|-----------------|-----------------|-----------------|-----------------|-----------------|-----------------|
| 1-1 | -                                               | 2% | 30.18   | 5.4     | 5.85    | 9.89257         | 9.77594         | 9.63926         | 9.57222         | 9.50603         | 9.41906         | 9.2703          | 9.22858         | 9.14616         | 9.12576         |
| 1-2 |                                                 |    | 29.69   | 5.63    | 5.71    | 10.13361        | 10.08455        | 9.98771         | 9.9162          | 9.79906         | 9.68443         | 9.55007         | 9.55007         | 9.44067         | 9.35478         |
| 1-3 |                                                 |    | 30.3    | 5.7     | 6.06    | 9.86904         | 9.79906         | 9.6618          | 9.55007         | 9.48415         | 9.37612         | 9.31237         | 9.2494          | 9.1872          | 9.12576         |
| 2-1 | -                                               | 4% | 31.3    | 8.42    | 7.5     | 10.516          | 10.18311        | 9.84561         | 9.63926         | 9.55007         | 9.44067         | 9.33353         | 9.2494          | 9.14616         | 8.98526         |
| 2-2 |                                                 |    | 31.92   | 9.03    | 7.88    | 10.33432        | 9.96377         | 9.6618          | 9.46236         | 9.31237         | 9.1872          | 9.12576         | 8.96551         | 8.79123         | 8.71572         |
| 2-3 |                                                 |    | 31.29   | 8.3     | 7.54    | 10.516          | 10.18311        | 9.9162          | 9.72999         | 9.55007         | 9.46236         | 9.37612         | 9.2703          | 9.10545         | 8.98526         |
| 3-1 | -                                               | 6% | 26.15   | 3.59    | 3.63    | 11.01126        | 11.06894        | 11.186          | 11.2753         | 11.24539        | 11.21562        | 11.24539        | 11.2753         | 11.30536        | 11.30536        |
| 3-2 |                                                 |    | 26.93   | 4.29    | 4.35    | 10.81365        | 10.86944        | 10.92576        | 10.98262        | 10.95412        | 11.01126        | 11.01126        | 11.01126        | 11.01126        | 10.98262        |
| 3-3 |                                                 |    | 27.03   | 4.47    | 4.53    | 10.92576        | 10.89753        | 10.86944        | 10.92576        | 10.95412        | 11.01126        | 11.06894        | 11.04003        | 11.06894        | 10.95412        |
| 4-1 | Al <sub>2</sub> (SO <sub>4</sub> ) <sub>3</sub> | 4% | 32.69   | 9.97    | 8.96    | 9.89257         | 9.68443         | 9.46236         | 9.31237         | 9.16664         | 9.04499         | 8.94583         | 8.86792         | 8.75333         | 8.60464         |
| 4-2 |                                                 |    | 32.07   | 9.86    | 8.49    | 10.01176        | 9.82229         | 9.59447         | 9.39754         | 9.2703          | 9.1872          | 9.08521         | 9.06506         | 8.94583         | 8.84863         |
| 4-3 |                                                 |    | 32.66   | 9.83    | 9.25    | 10.10902        | 9.86904         | 9.6618          | 9.50603         | 9.35478         | 9.2703          | 9.14616         | 8.98526         | 8.86792         | 8.73449         |
| 5-1 | P. granatum                                     | 4% | 29.84   | 11.85   | 9.89    | 12.38768        | 12.31667        | 12.14241        | 11.93925        | 11.7747         | 11.71006        | 11.55128        | 11.36593        | 11.30536        | 11.2753         |
| 5-2 |                                                 |    | 30.8    | 12.46   | 10.39   | 11.906          | 11.7423         | 11.61431        | 11.45791        | 11.24539        | 11.09799        | 10.92576        | 10.86944        | 10.75839        | 10.64941        |
| 5-3 |                                                 |    | 30.68   | 12.14   | 10.26   | 12.04003        | 12.00626        | 11.71006        | 11.48888        | 11.4271         | 11.186          | 11.06894        | 10.95412        | 10.81365        | 10.64941        |
| 6-1 | C. sinensis                                     | 4% | 32.24   | 12.18   | 10.29   | 10.95412        | 10.81365        | 10.64941        | 10.4635         | 10.23306        | 10.03592        | 9.9162          | 9.77594         | 9.55007         | 9.48415         |
| 6-2 |                                                 |    | 32.14   | 12.47   | 10.65   | 11.186          | 11.01126        | 10.81365        | 10.62248        | 10.38564        | 10.20803        | 10.08455        | 9.9162          | 9.82229         | 9.70716         |
| 6-3 |                                                 |    | 32.35   | 12.07   | 10.31   | 11.04003        | 10.84148        | 10.56899        | 10.35992        | 10.13361        | 9.96377         | 9.84561         | 9.6618          | 9.55007         | 9.35478         |
| 7-1 | R. coriaria                                     | 4% | 29.94   | 11.53   | 8.17    | 11.39644        | 11.15652        | 10.89753        | 10.75839        | 10.67646        | 10.56899        | 10.43743        | 10.38564        | 10.41147        | 10.25821        |
| 7-2 |                                                 |    | 29.96   | 11.63   | 8.05    | 11.33557        | 11.04003        | 10.84148        | 10.75839        | 10.64941        | 10.516          | 10.35992        | 10.35992        | 10.23306        | 10.20803        |
| 7-3 |                                                 |    | 29.76   | 10.9    | 7.08    | 11.06894        | 10.73095        | 10.48969        | 10.35992        | 10.25821        | 10.18311        | 10.10902        | 10.13361        | 9.9162          | 9.86904         |

|     |       |       |       |       |         |         |         |         |         |         |         |         |         |         |
|-----|-------|-------|-------|-------|---------|---------|---------|---------|---------|---------|---------|---------|---------|---------|
| 8-1 | Blank | 86    | -0.86 | 11.15 | 1.10792 | 0.79969 | 0.61078 | 0.49466 | 0.40968 | 0.33908 | 0.27983 | 0.23525 | 0.19886 | 0.17373 |
| 8-2 |       | 86.67 | -0.86 | 11.09 | 1.00096 | 0.71988 | 0.55269 | 0.45158 | 0.37537 | 0.31196 | 0.25899 | 0.21766 | 0.1834  | 0.16116 |
| 8-3 |       | 86.38 | -0.7  | 11.27 | 1.0705  | 0.77785 | 0.59893 | 0.48549 | 0.40024 | 0.32948 | 0.27148 | 0.22768 | 0.19243 | 0.16842 |

| No. | Mordant                                         | RE | K/S<br>Val(460) | K/S<br>Val(470) | K/S<br>Val(480) | K/S<br>Val(490) | K/S<br>Val(500) | K/S<br>Val(510) | K/S<br>Val(520) | K/S<br>Val(530) | K/S<br>Val(540) | K/S<br>Val(550) | K/S<br>Val(560) | K/S<br>Val(570) |
|-----|-------------------------------------------------|----|-----------------|-----------------|-----------------|-----------------|-----------------|-----------------|-----------------|-----------------|-----------------|-----------------|-----------------|-----------------|
| 1-1 | -                                               | 2% | 8.92624         | 8.77224         | 8.60464         | 8.4251          | 8.46046         | 8.40751         | 8.11841         | 7.8158          | 7.64969         | 7.51841         | 7.21386         | 6.73661         |
| 1-2 |                                                 |    | 9.1872          | 9.12576         | 8.94583         | 8.77224         | 8.86792         | 8.75333         | 8.47825         | 8.10196         | 7.95657         | 7.83122         | 7.51841         | 6.98058         |
| 1-3 |                                                 |    | 8.92624         | 8.77224         | 8.60464         | 8.4251          | 8.46046         | 8.39            | 8.15149         | 7.78512         | 7.60548         | 7.50408         | 7.18726         | 6.67796         |
| 2-1 | -                                               | 4% | 8.75333         | 8.532           | 8.40751         | 8.30339         | 8.30339         | 8.26919         | 8.13492         | 7.7244          | 7.46135         | 7.29471         | 6.93054         | 6.26003         |
| 2-2 |                                                 |    | 8.47825         | 8.30339         | 8.15149         | 8.03676         | 7.98847         | 8.00451         | 7.89345         | 7.48979         | 7.22722         | 7.06969         | 6.67796         | 5.99005         |
| 2-3 |                                                 |    | 8.79123         | 8.62298         | 8.40751         | 8.28626         | 8.26919         | 8.25219         | 8.11841         | 7.70936         | 7.47555         | 7.29471         | 6.89344         | 6.24966         |
| 3-1 | -                                               | 6% | 11.15652        | 11.04003        | 10.98262        | 10.84148        | 10.73095        | 10.70364        | 10.54244        | 10.33432        | 10.08455        | 9.89257         | 9.57222         | 9.1872          |
| 3-2 |                                                 |    | 10.84148        | 10.64941        | 10.62248        | 10.43743        | 10.35992        | 10.30883        | 10.10902        | 9.86904         | 9.63926         | 9.39754         | 9.08521         | 8.64138         |
| 3-3 |                                                 |    | 10.84148        | 10.62248        | 10.59567        | 10.38564        | 10.35992        | 10.33432        | 10.10902        | 9.82229         | 9.57222         | 9.35478         | 9.025           | 8.56818         |
| 4-1 | Al <sub>2</sub> (SO <sub>4</sub> ) <sub>3</sub> | 4% | 8.40751         | 8.21838         | 8.11841         | 7.89345         | 7.84669         | 7.84669         | 7.67942         | 7.18726         | 6.89344         | 6.68962         | 6.34414         | 5.67776         |
| 4-2 |                                                 |    | 8.67841         | 8.44275         | 8.39            | 8.15149         | 8.11841         | 8.11841         | 7.9249          | 7.48979         | 7.17402         | 7.00583         | 6.65475         | 5.97086         |
| 4-3 |                                                 |    | 8.58638         | 8.32058         | 8.20156         | 7.98847         | 7.87781         | 7.87781         | 7.67942         | 7.18726         | 6.86889         | 6.67796         | 6.33352         | 5.67776         |
| 5-1 | P. granatum                                     | 4% | 11.04003        | 10.89753        | 10.70364        | 10.54244        | 10.35992        | 10.13361        | 9.98771         | 9.528           | 8.94583         | 8.37254         | 7.84669         | 7.13458         |
| 5-2 |                                                 |    | 10.48969        | 10.25821        | 10.06018        | 9.93993         | 9.72999         | 9.57222         | 9.39754         | 8.98526         | 8.4251          | 7.87781         | 7.36333         | 6.66634         |
| 5-3 |                                                 |    | 10.48969        | 10.25821        | 10.15831        | 9.9162          | 9.75291         | 9.6618          | 9.39754         | 8.94583         | 8.4251          | 7.90914         | 7.41906         | 6.71304         |
| 6-1 | C. sinensis                                     | 4% | 9.22858         | 9.025           | 8.92624         | 8.75333         | 8.58638         | 8.47825         | 8.37254         | 7.98847         | 7.51841         | 7.08258         | 6.63168         | 6.00935         |
| 6-2 |                                                 |    | 9.48415         | 9.29129         | 9.10545         | 8.96551         | 8.84863         | 8.64138         | 8.532           | 8.10196         | 7.62017         | 7.14768         | 6.66634         | 6.02876         |
| 6-3 |                                                 |    | 9.20785         | 8.92624         | 8.84863         | 8.65986         | 8.51402         | 8.39            | 8.28626         | 7.89345         | 7.43311         | 7.00583         | 6.57463         | 5.94228         |
| 7-1 | R. coriaria                                     | 4% | 10.10902        | 9.93993         | 9.86904         | 9.6618          | 9.6618          | 9.68443         | 9.55007         | 9.16664         | 8.84863         | 8.58638         | 8.08557         | 7.32202         |
| 7-2 |                                                 |    | 10.10902        | 9.84561         | 9.82229         | 9.6618          | 9.68443         | 9.61682         | 9.55007         | 9.1872          | 8.82942         | 8.58638         | 8.13492         | 7.32202         |
| 7-3 |                                                 |    | 9.77594         | 9.59447         | 9.528           | 9.39754         | 9.41906         | 9.50603         | 9.44067         | 9.10545         | 8.84863         | 8.60464         | 8.20156         | 7.50408         |

|     |       |         |         |         |         |         |         |         |         |         |         |         |         |
|-----|-------|---------|---------|---------|---------|---------|---------|---------|---------|---------|---------|---------|---------|
| 8-1 | Blank | 0.15246 | 0.13584 | 0.12183 | 0.10857 | 0.09692 | 0.08875 | 0.08425 | 0.07944 | 0.07518 | 0.08875 | 0.08425 | 0.07944 |
| 8-2 |       | 0.14106 | 0.12552 | 0.11227 | 0.09875 | 0.08829 | 0.08078 | 0.07594 | 0.07113 | 0.06719 | 0.08078 | 0.07594 | 0.07113 |
| 8-3 |       | 0.14672 | 0.13113 | 0.11758 | 0.10424 | 0.09362 | 0.08539 | 0.07993 | 0.07506 | 0.07136 | 0.08539 | 0.07993 | 0.07506 |

| No. | Mordant                                         | RE | K/S<br>Val(580) | K/S<br>Val(590) | K/S<br>Val(600) | K/S<br>Val(610) | K/S<br>Val(620) | K/S<br>Val(630) | K/S<br>Val(640) | K/S<br>Val(650) | K/S<br>Val(660) | K/S<br>Val(670) | K/S<br>Val(680) | K/S<br>Val(690) | K/S<br>Val(700) |
|-----|-------------------------------------------------|----|-----------------|-----------------|-----------------|-----------------|-----------------|-----------------|-----------------|-----------------|-----------------|-----------------|-----------------|-----------------|-----------------|
| 1-1 | -                                               | 2% | 6.31237         | 5.92335         | 5.61695         | 5.35273         | 5.0873          | 4.84356         | 4.64998         | 4.51616         | 4.44009         | 4.37739         | 4.21898         | 4.10001         | 4.01559         |
| 1-2 |                                                 |    | 6.56332         | 6.14753         | 5.81197         | 5.52363         | 5.22852         | 4.97335         | 4.72582         | 4.57011         | 4.49252         | 4.41712         | 4.2296          | 4.09496         | 3.99131         |
| 1-3 |                                                 |    | 6.24966         | 5.84869         | 5.52363         | 5.24377         | 4.95941         | 4.71303         | 4.52806         | 4.38303         | 4.31615         | 4.25633         | 4.07488         | 3.95772         | 3.86886         |
| 2-1 | -                                               | 4% | 5.67776         | 5.22092         | 4.84356         | 4.49252         | 4.14075         | 3.7788          | 3.48128         | 3.22667         | 3.09426         | 2.99138         | 2.82868         | 2.61168         | 2.45685         |
| 2-2 |                                                 |    | 5.38458         | 4.92485         | 4.546           | 4.19263         | 3.85056         | 3.51635         | 3.23696         | 2.99746         | 2.85953         | 2.76314         | 2.61414         | 2.4302          | 2.30128         |
| 2-3 |                                                 |    | 5.66027         | 5.22092         | 4.86367         | 4.51616         | 4.1562          | 3.80545         | 3.5046          | 3.26466         | 3.12654         | 3.03125         | 2.86519         | 2.63643         | 2.4726          |
| 3-1 | -                                               | 6% | 8.88728         | 8.46046         | 8.15149         | 7.86222         | 7.60548         | 7.32202         | 7.08258         | 6.8445          | 6.76033         | 6.56332         | 6.39772         | 6.18803         | 6.00935         |
| 3-2 |                                                 |    | 8.25219         | 7.84669         | 7.48979         | 7.16083         | 6.86889         | 6.58597         | 6.33352         | 6.14753         | 6.01904         | 5.90453         | 5.72189         | 5.5404          | 5.41675         |
| 3-3 |                                                 |    | 8.16812         | 7.75465         | 7.3911          | 7.05683         | 6.73661         | 6.46307         | 6.19822         | 6.00935         | 5.8672          | 5.76663         | 5.5827          | 5.40062         | 5.25143         |
| 4-1 | Al <sub>2</sub> (SO <sub>4</sub> ) <sub>3</sub> | 4% | 5.05122         | 4.61899         | 4.25633         | 3.89656         | 3.52423         | 3.1298          | 2.80931         | 2.56083         | 2.4726          | 2.45015         | 2.27115         | 1.97992         | 1.8037          |
| 4-2 |                                                 |    | 5.32906         | 4.8975          | 4.51616         | 4.11521         | 3.70919         | 3.28569         | 2.91698         | 2.63893         | 2.49536         | 2.428           | 2.24356         | 1.97505         | 1.81082         |
| 4-3 |                                                 |    | 5.0584          | 4.61283         | 4.25633         | 3.89656         | 3.52817         | 3.14946         | 2.83146         | 2.61168         | 2.56083         | 2.56083         | 2.35284         | 2.0245          | 1.82374         |
| 5-1 | P. granatum                                     | 4% | 6.33352         | 5.5827          | 4.92485         | 4.32166         | 3.82339         | 3.4203          | 3.1168          | 2.90535         | 2.81483         | 2.76046         | 2.59213         | 2.34031         | 2.16928         |
| 5-2 |                                                 |    | 5.90453         | 5.19071         | 4.51616         | 3.93874         | 3.46587         | 3.09106         | 2.81759         | 2.62154         | 2.52544         | 2.46583         | 2.32788         | 2.13259         | 1.99298         |
| 5-3 |                                                 |    | 5.97086         | 5.24377         | 4.58834         | 4.01559         | 3.552           | 3.17598         | 2.89667         | 2.68705         | 2.58244         | 2.51149         | 2.36336         | 2.17486         | 2.0346          |
| 6-1 | C. sinensis                                     | 4% | 5.31338         | 4.66875         | 4.10001         | 3.60045         | 3.18601         | 2.84825         | 2.60432         | 2.42361         | 2.32581         | 2.25729         | 2.1344          | 1.97667         | 1.86629         |
| 6-2 |                                                 |    | 5.33693         | 4.67503         | 4.07988         | 3.57206         | 3.16599         | 2.82868         | 2.58727         | 2.40833         | 2.32375         | 2.26124         | 2.13622         | 1.97182         | 1.86033         |
| 6-3 |                                                 |    | 5.28225         | 4.64375         | 4.07988         | 3.5761          | 3.16931         | 2.84544         | 2.59699         | 2.41486         | 2.32581         | 2.25532         | 2.13259         | 1.97829         | 1.86778         |
| 7-1 | R. coriaria                                     | 4% | 6.43025         | 5.59978         | 4.87716         | 4.30517         | 3.86427         | 3.5046          | 3.22667         | 2.99746         | 2.85953         | 2.76314         | 2.59943         | 2.40833         | 2.26916         |
| 7-2 |                                                 |    | 6.4521          | 5.60835         | 4.86367         | 4.28335         | 3.84147         | 3.48128         | 3.20624         | 2.98532         | 2.84544         | 2.74979         | 2.58727         | 2.39751         | 2.25532         |
| 7-3 |                                                 |    | 6.68962         | 5.83947         | 5.09457         | 4.46909         | 4.01559         | 3.6375          | 3.36468         | 3.12329         | 2.97928         | 2.87372         | 2.70511         | 2.49536         | 2.34865         |

|     |       |         |         |         |         |         |         |         |         |         |         |         |         |         |
|-----|-------|---------|---------|---------|---------|---------|---------|---------|---------|---------|---------|---------|---------|---------|
| 8-1 | Blank | 0.08875 | 0.08425 | 0.07944 | 0.07518 | 0.07086 | 0.05343 | 0.05211 | 0.05006 | 0.0485  | 0.04752 | 0.04605 | 0.04481 | 0.04336 |
| 8-2 |       | 0.08078 | 0.07594 | 0.07113 | 0.06719 | 0.06408 | 0.04752 | 0.04597 | 0.04453 | 0.0428  | 0.04221 | 0.04051 | 0.03919 | 0.03819 |
| 8-3 |       | 0.08539 | 0.07993 | 0.07506 | 0.07136 | 0.0673  | 0.04867 | 0.04722 | 0.04547 | 0.04424 | 0.04304 | 0.04198 | 0.04036 | 0.03971 |

| No. | Mordant                                         | RE | K/S<br>Val(710) | K/S<br>Val(720) | K/S<br>Val(730) | K/S<br>Val(740) | h<br>(D65) | C*<br>(D65) |
|-----|-------------------------------------------------|----|-----------------|-----------------|-----------------|-----------------|------------|-------------|
| 1-1 | -                                               | 2% | 3.94347         | 3.93401         | 3.86427         | 3.8279          | 47.26      | 7.96        |
| 1-2 |                                                 |    | 3.91054         | 3.89656         | 3.83241         | 3.79209         | 45.4       | 8.02        |
| 1-3 |                                                 |    | 3.80099         | 3.78322         | 3.72208         | 3.6794          | 46.77      | 8.32        |
| 2-1 | -                                               | 4% | 2.36759         | 2.28915         | 2.2203          | 2.1435          | 41.71      | 11.28       |
| 2-2 |                                                 |    | 2.22608         | 2.15633         | 2.10035         | 2.0346          | 41.1       | 11.99       |
| 2-3 |                                                 |    | 2.38248         | 2.30331         | 2.23771         | 2.16002         | 42.24      | 11.21       |
| 3-1 | -                                               | 6% | 5.8672          | 5.77564         | 5.63421         | 5.51528         | 45.33      | 5.1         |
| 3-2 |                                                 |    | 5.28225         | 5.22092         | 5.0873          | 4.98735         | 45.4       | 6.11        |
| 3-3 |                                                 |    | 5.13856         | 5.07281         | 4.95941         | 4.87041         | 45.36      | 6.37        |
| 4-1 | Al <sub>2</sub> (SO <sub>4</sub> ) <sub>3</sub> | 4% | 1.72391         | 1.66034         | 1.61936         | 1.57039         | 41.94      | 13.41       |
| 4-2 |                                                 |    | 1.73193         | 1.67049         | 1.62916         | 1.5786          | 40.72      | 13.01       |
| 4-3 |                                                 |    | 1.73193         | 1.66034         | 1.61328         | 1.56223         | 43.26      | 13.49       |
| 5-1 | P.<br>granatum                                  | 4% | 2.06709         | 1.97505         | 1.90873         | 1.82808         | 39.86      | 15.44       |
| 5-2 |                                                 |    | 1.91027         | 1.83679         | 1.78117         | 1.71462         | 39.83      | 16.22       |
| 5-3 |                                                 |    | 1.94781         | 1.87376         | 1.81368         | 1.74135         | 40.2       | 15.89       |
| 6-1 | C. sinensis                                     | 4% | 1.79803         | 1.73865         | 1.68847         | 1.6304          | 40.21      | 15.94       |
| 6-2 |                                                 |    | 1.79098         | 1.72658         | 1.67816         | 1.62303         | 40.49      | 16.4        |
| 6-3 |                                                 |    | 1.79803         | 1.73731         | 1.68588         | 1.62793         | 40.5       | 15.88       |
| 7-1 | R. coriaria                                     | 4% | 2.18046         | 2.10035         | 2.03799         | 1.96056         | 35.3       | 14.13       |
| 7-2 |                                                 |    | 2.16928         | 2.09152         | 2.02786         | 1.95736         | 34.71      | 14.14       |
| 7-3 |                                                 |    | 2.24943         | 2.16742         | 2.09328         | 2.0128          | 33         | 12.99       |

|     |       |         |         |         |         |       |       |
|-----|-------|---------|---------|---------|---------|-------|-------|
| 8-1 | Blank | 0.04269 | 0.04174 | 0.04097 | 0.04051 | 94.42 | 11.18 |
| 8-2 |       | 0.03724 | 0.03652 | 0.03588 | 0.03567 | 94.44 | 11.12 |
| 8-3 |       | 0.0387  | 0.03775 | 0.03731 | 0.0371  | 93.53 | 11.29 |

**UV/ Visible spectrum**

| WL (nm) | Before dyeing |       | After dyeing |       |
|---------|---------------|-------|--------------|-------|
|         | Abs           | T%    | Abs          | T%    |
| 350     | 0.6266        | 23.63 | 0.3249       | 47.32 |
| 351     | 0.6175        | 24.13 | 0.3169       | 48.21 |
| 352     | 0.607         | 24.72 | 0.3103       | 48.94 |
| 353     | 0.598         | 25.24 | 0.3057       | 49.47 |
| 354     | 0.587         | 25.88 | 0.3035       | 49.71 |
| 355     | 0.5782        | 26.41 | 0.3016       | 49.94 |
| 356     | 0.568         | 27.04 | 0.2969       | 50.47 |
| 357     | 0.5586        | 27.63 | 0.2905       | 51.23 |
| 358     | 0.5488        | 28.26 | 0.2867       | 51.68 |
| 359     | 0.5382        | 28.96 | 0.282        | 52.24 |
| 360     | 0.5326        | 29.34 | 0.2773       | 52.8  |
| 361     | 0.5245        | 29.89 | 0.2728       | 53.36 |
| 362     | 0.5186        | 30.3  | 0.2706       | 53.62 |
| 363     | 0.5124        | 30.73 | 0.2668       | 54.1  |
| 364     | 0.5067        | 31.14 | 0.2632       | 54.55 |
| 365     | 0.5028        | 31.42 | 0.2591       | 55.06 |
| 366     | 0.4989        | 31.7  | 0.2553       | 55.55 |
| 367     | 0.4936        | 32.09 | 0.2514       | 56.05 |
| 368     | 0.4901        | 32.35 | 0.2483       | 56.46 |
| 369     | 0.4847        | 32.76 | 0.2449       | 56.89 |
| 370     | 0.4789        | 33.19 | 0.2432       | 57.12 |
| 371     | 0.4705        | 33.85 | 0.2382       | 57.78 |
| 372     | 0.4668        | 34.14 | 0.2361       | 58.06 |
| 373     | 0.4599        | 34.68 | 0.235        | 58.2  |
| 374     | 0.4571        | 34.9  | 0.232        | 58.62 |
| 375     | 0.4561        | 34.99 | 0.2278       | 59.19 |
| 376     | 0.4514        | 35.37 | 0.2252       | 59.54 |
| 377     | 0.4459        | 35.82 | 0.2225       | 59.9  |
| 378     | 0.4442        | 35.96 | 0.2194       | 60.33 |
| 379     | 0.4437        | 36    | 0.2175       | 60.6  |
| 380     | 0.4409        | 36.23 | 0.2156       | 60.88 |
| 381     | 0.4383        | 36.45 | 0.213        | 61.24 |
| 382     | 0.4328        | 36.92 | 0.2086       | 61.85 |
| 383     | 0.4356        | 36.68 | 0.2081       | 61.93 |
| 384     | 0.4337        | 36.84 | 0.2069       | 62.11 |
| 385     | 0.4321        | 36.98 | 0.2043       | 62.48 |
| 386     | 0.4313        | 37.05 | 0.2041       | 62.51 |
| 387     | 0.4322        | 36.97 | 0.202        | 62.81 |
| 388     | 0.4302        | 37.13 | 0.2007       | 63    |

|     |        |       |        |       |
|-----|--------|-------|--------|-------|
| 389 | 0.4289 | 37.25 | 0.1992 | 63.21 |
| 390 | 0.431  | 37.07 | 0.1995 | 63.17 |
| 391 | 0.4303 | 37.13 | 0.1981 | 63.37 |
| 392 | 0.4294 | 37.2  | 0.1973 | 63.49 |
| 393 | 0.4295 | 37.2  | 0.1968 | 63.56 |
| 394 | 0.4307 | 37.09 | 0.1955 | 63.75 |
| 395 | 0.4311 | 37.06 | 0.1949 | 63.84 |
| 396 | 0.4324 | 36.95 | 0.194  | 63.98 |
| 397 | 0.4341 | 36.81 | 0.1945 | 63.89 |
| 398 | 0.4344 | 36.77 | 0.1936 | 64.03 |
| 399 | 0.4353 | 36.7  | 0.1931 | 64.11 |
| 400 | 0.4365 | 36.6  | 0.1926 | 64.18 |
| 401 | 0.4385 | 36.43 | 0.1928 | 64.15 |
| 402 | 0.4394 | 36.36 | 0.1927 | 64.17 |
| 403 | 0.4396 | 36.34 | 0.1919 | 64.28 |
| 404 | 0.4427 | 36.08 | 0.1923 | 64.23 |
| 405 | 0.4439 | 35.99 | 0.1917 | 64.31 |
| 406 | 0.4449 | 35.9  | 0.1927 | 64.17 |
| 407 | 0.4451 | 35.88 | 0.192  | 64.27 |
| 408 | 0.447  | 35.73 | 0.192  | 64.27 |
| 409 | 0.4476 | 35.68 | 0.1917 | 64.32 |
| 410 | 0.4478 | 35.66 | 0.1911 | 64.41 |
| 411 | 0.4502 | 35.47 | 0.1911 | 64.4  |
| 412 | 0.4515 | 35.36 | 0.1907 | 64.47 |
| 413 | 0.4522 | 35.3  | 0.1899 | 64.58 |
| 414 | 0.4531 | 35.23 | 0.1898 | 64.59 |
| 415 | 0.4537 | 35.18 | 0.1901 | 64.54 |
| 416 | 0.4546 | 35.1  | 0.1896 | 64.62 |
| 417 | 0.4553 | 35.05 | 0.1893 | 64.68 |
| 418 | 0.4559 | 35    | 0.1889 | 64.73 |
| 419 | 0.4556 | 35.02 | 0.1883 | 64.82 |
| 420 | 0.4564 | 34.96 | 0.1886 | 64.78 |
| 421 | 0.4581 | 34.83 | 0.1883 | 64.82 |
| 422 | 0.4591 | 34.75 | 0.1883 | 64.82 |
| 423 | 0.4591 | 34.75 | 0.1876 | 64.92 |
| 424 | 0.4596 | 34.71 | 0.1877 | 64.91 |
| 425 | 0.4598 | 34.69 | 0.187  | 65.01 |
| 426 | 0.4598 | 34.69 | 0.1873 | 64.97 |
| 427 | 0.46   | 34.67 | 0.1871 | 65    |
| 428 | 0.4592 | 34.74 | 0.1865 | 65.09 |
| 429 | 0.4589 | 34.76 | 0.1859 | 65.18 |
| 430 | 0.4586 | 34.79 | 0.1853 | 65.26 |
| 431 | 0.4579 | 34.84 | 0.1848 | 65.34 |
| 432 | 0.4573 | 34.89 | 0.1844 | 65.41 |
| 433 | 0.4567 | 34.94 | 0.1841 | 65.45 |
| 434 | 0.456  | 34.99 | 0.1836 | 65.52 |
| 435 | 0.4555 | 35.04 | 0.1831 | 65.6  |
| 436 | 0.455  | 35.07 | 0.1827 | 65.65 |
| 437 | 0.4535 | 35.19 | 0.1822 | 65.73 |
| 438 | 0.4526 | 35.27 | 0.1819 | 65.78 |

|     |        |       |        |       |
|-----|--------|-------|--------|-------|
| 439 | 0.4521 | 35.31 | 0.1814 | 65.86 |
| 440 | 0.4503 | 35.46 | 0.1806 | 65.97 |
| 441 | 0.4494 | 35.53 | 0.1804 | 66.01 |
| 442 | 0.4473 | 35.7  | 0.1796 | 66.12 |
| 443 | 0.4461 | 35.8  | 0.1792 | 66.19 |
| 444 | 0.4445 | 35.93 | 0.1782 | 66.35 |
| 445 | 0.443  | 36.06 | 0.1773 | 66.48 |
| 446 | 0.4413 | 36.2  | 0.1761 | 66.66 |
| 447 | 0.4398 | 36.33 | 0.1757 | 66.72 |
| 448 | 0.4378 | 36.49 | 0.1747 | 66.88 |
| 449 | 0.4367 | 36.59 | 0.1743 | 66.94 |
| 450 | 0.4349 | 36.73 | 0.1741 | 66.97 |
| 451 | 0.4325 | 36.94 | 0.1723 | 67.25 |
| 452 | 0.43   | 37.15 | 0.1713 | 67.41 |
| 453 | 0.4275 | 37.37 | 0.1708 | 67.49 |
| 454 | 0.425  | 37.58 | 0.1699 | 67.62 |
| 455 | 0.4234 | 37.72 | 0.1682 | 67.89 |
| 456 | 0.4217 | 37.87 | 0.1681 | 67.9  |
| 457 | 0.4191 | 38.1  | 0.1669 | 68.09 |
| 458 | 0.4166 | 38.32 | 0.1666 | 68.13 |
| 459 | 0.4154 | 38.42 | 0.1659 | 68.25 |
| 460 | 0.4133 | 38.61 | 0.1652 | 68.35 |
| 461 | 0.4099 | 38.92 | 0.1644 | 68.48 |
| 462 | 0.4083 | 39.06 | 0.1635 | 68.63 |
| 463 | 0.4072 | 39.15 | 0.1627 | 68.75 |
| 464 | 0.405  | 39.35 | 0.1619 | 68.88 |
| 465 | 0.4022 | 39.61 | 0.1607 | 69.07 |
| 466 | 0.3995 | 39.86 | 0.1603 | 69.14 |
| 467 | 0.3983 | 39.97 | 0.1593 | 69.29 |
| 468 | 0.3973 | 40.06 | 0.1584 | 69.43 |
| 469 | 0.3948 | 40.29 | 0.1578 | 69.54 |
| 470 | 0.3936 | 40.4  | 0.1574 | 69.59 |
| 471 | 0.3916 | 40.59 | 0.1566 | 69.72 |
| 472 | 0.3888 | 40.85 | 0.1556 | 69.88 |
| 473 | 0.3867 | 41.05 | 0.1546 | 70.05 |
| 474 | 0.3851 | 41.2  | 0.1538 | 70.18 |
| 475 | 0.3832 | 41.38 | 0.1531 | 70.29 |
| 476 | 0.3812 | 41.57 | 0.152  | 70.46 |
| 477 | 0.3792 | 41.77 | 0.1517 | 70.52 |
| 478 | 0.3781 | 41.87 | 0.1506 | 70.7  |
| 479 | 0.3767 | 42.01 | 0.1501 | 70.78 |
| 480 | 0.3746 | 42.21 | 0.1492 | 70.93 |
| 481 | 0.3726 | 42.4  | 0.1482 | 71.09 |
| 482 | 0.3717 | 42.49 | 0.147  | 71.28 |
| 483 | 0.3694 | 42.72 | 0.1468 | 71.31 |
| 484 | 0.3672 | 42.93 | 0.1462 | 71.41 |
| 485 | 0.3654 | 43.11 | 0.1451 | 71.59 |
| 486 | 0.3649 | 43.17 | 0.144  | 71.78 |
| 487 | 0.363  | 43.35 | 0.1432 | 71.92 |
| 488 | 0.3618 | 43.47 | 0.1425 | 72.02 |



|     |        |       |        |       |
|-----|--------|-------|--------|-------|
| 489 | 0.3594 | 43.71 | 0.1421 | 72.09 |
| 490 | 0.3577 | 43.89 | 0.1415 | 72.19 |
| 491 | 0.3552 | 44.13 | 0.1401 | 72.42 |
| 492 | 0.3537 | 44.29 | 0.1396 | 72.52 |
| 493 | 0.3518 | 44.48 | 0.1386 | 72.68 |
| 494 | 0.3517 | 44.5  | 0.1384 | 72.7  |
| 495 | 0.3499 | 44.67 | 0.1375 | 72.86 |
| 496 | 0.3475 | 44.93 | 0.1364 | 73.05 |
| 497 | 0.3457 | 45.11 | 0.1357 | 73.17 |
| 498 | 0.3439 | 45.3  | 0.1348 | 73.31 |
| 499 | 0.3423 | 45.47 | 0.134  | 73.45 |
| 500 | 0.3402 | 45.69 | 0.1335 | 73.54 |
| 501 | 0.3387 | 45.85 | 0.1325 | 73.71 |
| 502 | 0.337  | 46.03 | 0.1316 | 73.86 |
| 503 | 0.3353 | 46.21 | 0.1309 | 73.98 |
| 504 | 0.3333 | 46.42 | 0.13   | 74.13 |
| 505 | 0.331  | 46.66 | 0.1295 | 74.21 |
| 506 | 0.3294 | 46.84 | 0.1288 | 74.34 |
| 507 | 0.3274 | 47.05 | 0.1278 | 74.5  |
| 508 | 0.3263 | 47.17 | 0.1271 | 74.63 |
| 509 | 0.3237 | 47.46 | 0.1259 | 74.83 |
| 510 | 0.3215 | 47.7  | 0.1257 | 74.87 |
| 511 | 0.319  | 47.97 | 0.1249 | 75.01 |
| 512 | 0.3165 | 48.25 | 0.1239 | 75.18 |
| 513 | 0.3142 | 48.51 | 0.1229 | 75.35 |
| 514 | 0.3122 | 48.73 | 0.1222 | 75.47 |
| 515 | 0.3098 | 49    | 0.1213 | 75.64 |
| 516 | 0.3076 | 49.25 | 0.1206 | 75.75 |
| 517 | 0.3051 | 49.54 | 0.1198 | 75.9  |
| 518 | 0.3027 | 49.81 | 0.1188 | 76.07 |
| 519 | 0.3008 | 50.02 | 0.1182 | 76.17 |
| 520 | 0.2983 | 50.32 | 0.1173 | 76.34 |
| 521 | 0.2953 | 50.66 | 0.1165 | 76.46 |
| 522 | 0.293  | 50.93 | 0.1156 | 76.63 |
| 523 | 0.2903 | 51.25 | 0.1148 | 76.77 |
| 524 | 0.2874 | 51.59 | 0.1139 | 76.93 |
| 525 | 0.2853 | 51.84 | 0.1131 | 77.07 |
| 526 | 0.2824 | 52.19 | 0.1124 | 77.2  |
| 527 | 0.2799 | 52.49 | 0.1116 | 77.35 |
| 528 | 0.2773 | 52.81 | 0.1107 | 77.5  |
| 529 | 0.2752 | 53.06 | 0.11   | 77.62 |
| 530 | 0.2727 | 53.37 | 0.1092 | 77.77 |
| 531 | 0.2698 | 53.72 | 0.1083 | 77.93 |
| 532 | 0.2676 | 54    | 0.1077 | 78.03 |
| 533 | 0.2652 | 54.3  | 0.107  | 78.16 |
| 534 | 0.2624 | 54.65 | 0.1062 | 78.31 |
| 535 | 0.2601 | 54.94 | 0.1052 | 78.48 |
| 536 | 0.2578 | 55.24 | 0.1046 | 78.6  |
| 537 | 0.2554 | 55.54 | 0.1035 | 78.8  |
| 538 | 0.2518 | 56    | 0.1024 | 78.99 |

|     |        |       |        |       |
|-----|--------|-------|--------|-------|
| 539 | 0.2493 | 56.33 | 0.102  | 79.07 |
| 540 | 0.2473 | 56.59 | 0.1014 | 79.18 |
| 541 | 0.2454 | 56.84 | 0.1018 | 79.1  |
| 542 | 0.2424 | 57.23 | 0.1006 | 79.32 |
| 543 | 0.2403 | 57.5  | 0.1    | 79.43 |
| 544 | 0.2381 | 57.8  | 0.0996 | 79.51 |
| 545 | 0.2357 | 58.12 | 0.0988 | 79.65 |
| 546 | 0.2338 | 58.38 | 0.0982 | 79.77 |
| 547 | 0.2308 | 58.78 | 0.0973 | 79.94 |
| 548 | 0.2283 | 59.12 | 0.097  | 79.99 |
| 549 | 0.2259 | 59.45 | 0.0963 | 80.1  |
| 550 | 0.2229 | 59.86 | 0.0955 | 80.26 |
| 551 | 0.2204 | 60.21 | 0.0949 | 80.36 |
| 552 | 0.2182 | 60.5  | 0.0946 | 80.42 |
| 553 | 0.216  | 60.81 | 0.0941 | 80.53 |
| 554 | 0.2139 | 61.11 | 0.0932 | 80.68 |
| 555 | 0.2119 | 61.4  | 0.0929 | 80.73 |
| 556 | 0.2093 | 61.77 | 0.0922 | 80.88 |
| 557 | 0.2068 | 62.12 | 0.0918 | 80.94 |
| 558 | 0.2046 | 62.43 | 0.0913 | 81.03 |
| 559 | 0.202  | 62.8  | 0.0907 | 81.16 |
| 560 | 0.1997 | 63.14 | 0.0901 | 81.27 |
| 561 | 0.1971 | 63.53 | 0.0894 | 81.4  |
| 562 | 0.1942 | 63.94 | 0.0886 | 81.55 |
| 563 | 0.1914 | 64.36 | 0.0882 | 81.62 |
| 564 | 0.1894 | 64.66 | 0.0875 | 81.74 |
| 565 | 0.1876 | 64.92 | 0.0874 | 81.77 |
| 566 | 0.1856 | 65.22 | 0.0872 | 81.81 |
| 567 | 0.1834 | 65.55 | 0.0865 | 81.95 |
| 568 | 0.1817 | 65.82 | 0.0858 | 82.07 |
| 569 | 0.1791 | 66.21 | 0.0853 | 82.16 |
| 570 | 0.177  | 66.52 | 0.0848 | 82.25 |
| 571 | 0.1752 | 66.8  | 0.0843 | 82.36 |
| 572 | 0.1732 | 67.11 | 0.0839 | 82.44 |
| 573 | 0.171  | 67.46 | 0.0833 | 82.55 |
| 574 | 0.1688 | 67.79 | 0.0827 | 82.65 |
| 575 | 0.1668 | 68.1  | 0.0824 | 82.73 |
| 576 | 0.1652 | 68.36 | 0.0822 | 82.76 |
| 577 | 0.1639 | 68.56 | 0.0823 | 82.74 |
| 578 | 0.1623 | 68.81 | 0.0818 | 82.84 |
| 579 | 0.1608 | 69.05 | 0.0813 | 82.92 |
| 580 | 0.1591 | 69.33 | 0.081  | 82.98 |
| 581 | 0.1579 | 69.52 | 0.0808 | 83.02 |
| 582 | 0.1566 | 69.73 | 0.0803 | 83.11 |
| 583 | 0.1549 | 70    | 0.08   | 83.18 |
| 584 | 0.1531 | 70.3  | 0.0798 | 83.22 |
| 585 | 0.1518 | 70.5  | 0.0794 | 83.3  |
| 586 | 0.1495 | 70.88 | 0.0756 | 84.03 |
| 587 | 0.148  | 71.12 | 0.0752 | 84.11 |
| 588 | 0.1469 | 71.3  | 0.0745 | 84.23 |

|     |        |       |        |       |
|-----|--------|-------|--------|-------|
| 589 | 0.1458 | 71.49 | 0.0742 | 84.29 |
| 590 | 0.1439 | 71.8  | 0.074  | 84.34 |
| 591 | 0.1427 | 72    | 0.074  | 84.32 |
| 592 | 0.1417 | 72.16 | 0.0737 | 84.4  |
| 593 | 0.1404 | 72.37 | 0.0731 | 84.5  |
| 594 | 0.1389 | 72.62 | 0.073  | 84.52 |
| 595 | 0.1384 | 72.71 | 0.0729 | 84.55 |
| 596 | 0.1373 | 72.89 | 0.0727 | 84.6  |
| 597 | 0.1362 | 73.07 | 0.0721 | 84.71 |
| 598 | 0.1343 | 73.4  | 0.0718 | 84.77 |
| 599 | 0.1325 | 73.71 | 0.0717 | 84.79 |
| 600 | 0.1319 | 73.81 | 0.0714 | 84.83 |
